# Supplementary material
Source: PubMed Central journal article supplement (PMC4312515)
Supplement: NIHMS626172-supplement-5.pdf [file NIHMS626172-supplement-5.pdf]

# Supplementary Figure 2

**A**

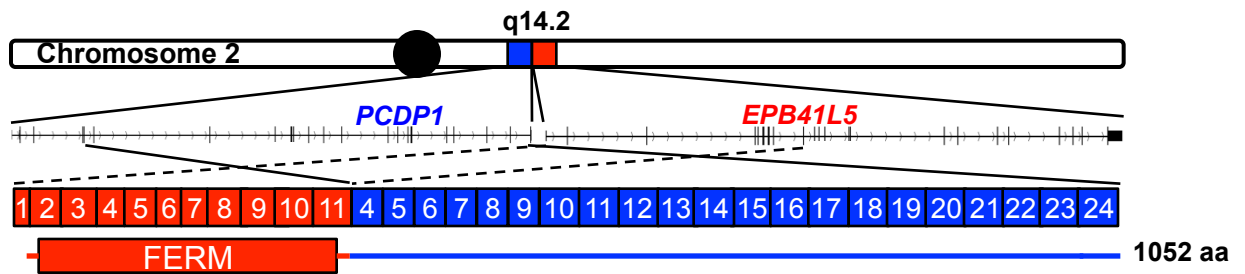

**B**

>EPB41L5:PCDP1

```

MLSFFRRTLG RRSMRKHAEK ERLREAQRAA THIPAAGDSK SIITCRVSLI DGTDVSVSLP
KKAKGQELFD QIMYHLDLIE SDYFGLRFMD SAQVAHWLDG TKSIAKQVKI GSPYCLHLRV
1KFYSSEPNN LREELTRYLF VLQLKQDILS GKLDLCPFDTA VQLAAYNLQA ELGDYDLAEH
SPELVSEFRF VPIQTEEMEL AIFEKWKEYR GQTPAQAEIN YLNKAKWLEM YGVDMHVVKA
RDGNDYSLGL TPTGVLVFEG DTKIGLFFWP KITRLDFKKN KLTLVVVEDD DQHLVNVSNE
DTRVHILPPQ TKYFEINYVR KEHHLVPGLS LTVTDTFSPD EWRYYYDCIR VHCKGDDTLL
VPIHAYPVMN SLDFPSFINL SNVLLGESKT YVIPLQCSCP VDFEFYITLI QSHQAFIIEP
TSGIIPANGK MVTIKFTPF QYGTAQIKMQ LWISQFNSQP YECVFTGTCY PNMALPLEEF
ERLNTLSKKV NVPPEKAMMH INFHRPPAKP KPQKVKEIEY QNLRFPVDLS NPFVAVTVLN
QEPGKLIKE LREVLDOGTE ISKTRQMKEA LFEQKVRQDI HEEMENHLKW QVHLGKDPMS
FKLKKELTEE WQKACAKYKL DRGDPIIDEE FQRLKTEVSH KRVRNQEEL IKEFHPTFDP
LINNTWLSRS RAQKRFQOVA RKVMIQGRLE NMLSAVREMD KESILRKIGQ AKQSIAQEAN
FFKFFLRIS QDDYTSRFSV SPKEVLPFAF PDCSPPQDSN ELAPDGLGLV PIKSSEVQIK
QSYSFFNLQV PQLYKIKRYQ PFSVHKSSTS YRPQKLARAL KQGAEDVTT ITALPKQDST
TQLSGKTSIL SMKPPALAM SLDYDPLYVF NPNPGLFAM HPLTYAETLI DYHLCSPKY
KFTKESRHGS SIPVTQKQFL HHTDIIPGIM HWKSFQSLVL SSLPDPKME TTKSCDSFNS
FMLPIDVPAI LDALPEEDRL ETVERELCEQ NVEVMLTPEM IKVEFPMLNY KDIRKEKEVK
DQAQPAEKAG EKLEEMRNL RGKALNTYLI LE
    
```
