# Supplementary material
Source: PubMed Central journal article supplement (PMC4312515)
Supplement: NIHMS626172-supplement-6.pdf [file NIHMS626172-supplement-6.pdf]

# Supplementary Figure 3

A

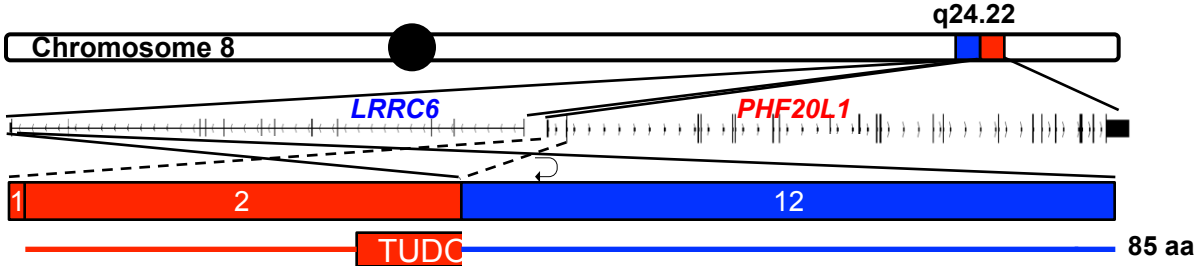

B

>PHF20L1:LRR6  
MSKKPPNRPG ITFEIGARLE ALDYLQKSSK HMEKLEVDPS KHSFPDVTNI VQEKKHTPRR  
RPEPKIIPSE EDPTFEDNPE VPPLI
