# Supplementary material
Source: PubMed Central journal article supplement (PMC4312515)
Supplement: NIHMS626172-supplement-12.pdf [file NIHMS626172-supplement-12.pdf]

# Supplementary Figure 9

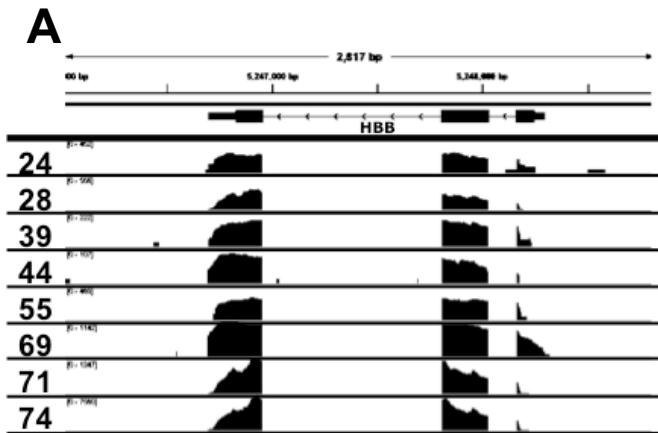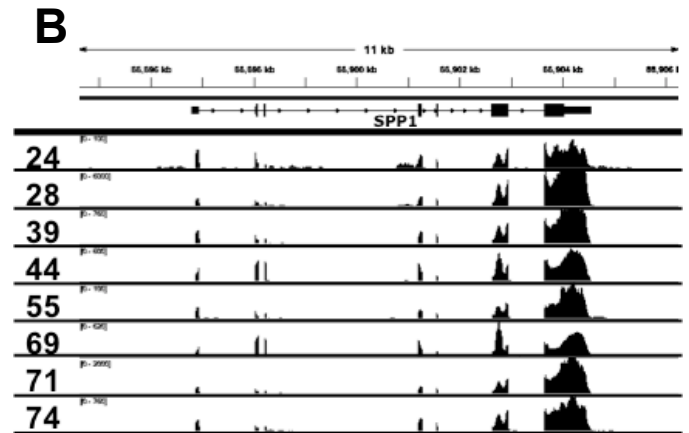

**C**

| Amplified Region | 66 NuGEN ss     |                    |            | 66 NuGEN ds     |                    |            | 66 RT cDNA      |                    |            |
|------------------|-----------------|--------------------|------------|-----------------|--------------------|------------|-----------------|--------------------|------------|
|                  | Avg. CT         | 0.5 <sup>dCT</sup> | Spl. Index | Avg. CT         | 0.5 <sup>dCT</sup> | Spl. Index | Avg. CT         | 0.5 <sup>dCT</sup> | Spl. Index |
| Ex4–Ex4          | 18.67           |                    |            | 19.35           |                    |            | 31.88           |                    |            |
| Ex4–Ex5          | 20.36           | 0.310              |            | 21.06           | 0.304              |            | 34.15           | 0.207              |            |
| Ex4–Int4         | 22.16           | 0.089              | 0.223      | 22.71           | 0.097              | 0.243      | 31.95           | 0.953              | 0.821      |
| Ex5–Ex5          | 20.28           |                    |            | 20.97           |                    |            | 31.45           |                    |            |
| Ex5–Ex6          | 20.19           | 1.061              |            | 20.95           | 1.011              |            | 33.00           | 0.342              |            |
| Ex5–Int5         | 23.34           | 0.120              | 0.101      | 23.64           | 0.156              | 0.133      | 31.54           | 0.940              | 0.733      |
|                  | <b>Average:</b> |                    | 0.162      | <b>Average:</b> |                    | 0.188      | <b>Average:</b> |                    | 0.777      |
