# Supplementary material
Source: PubMed Central journal article supplement (PMC4312515)
Supplement: NIHMS626172-supplement-13.pdf [file NIHMS626172-supplement-13.pdf]

# Supplementary Figure 10

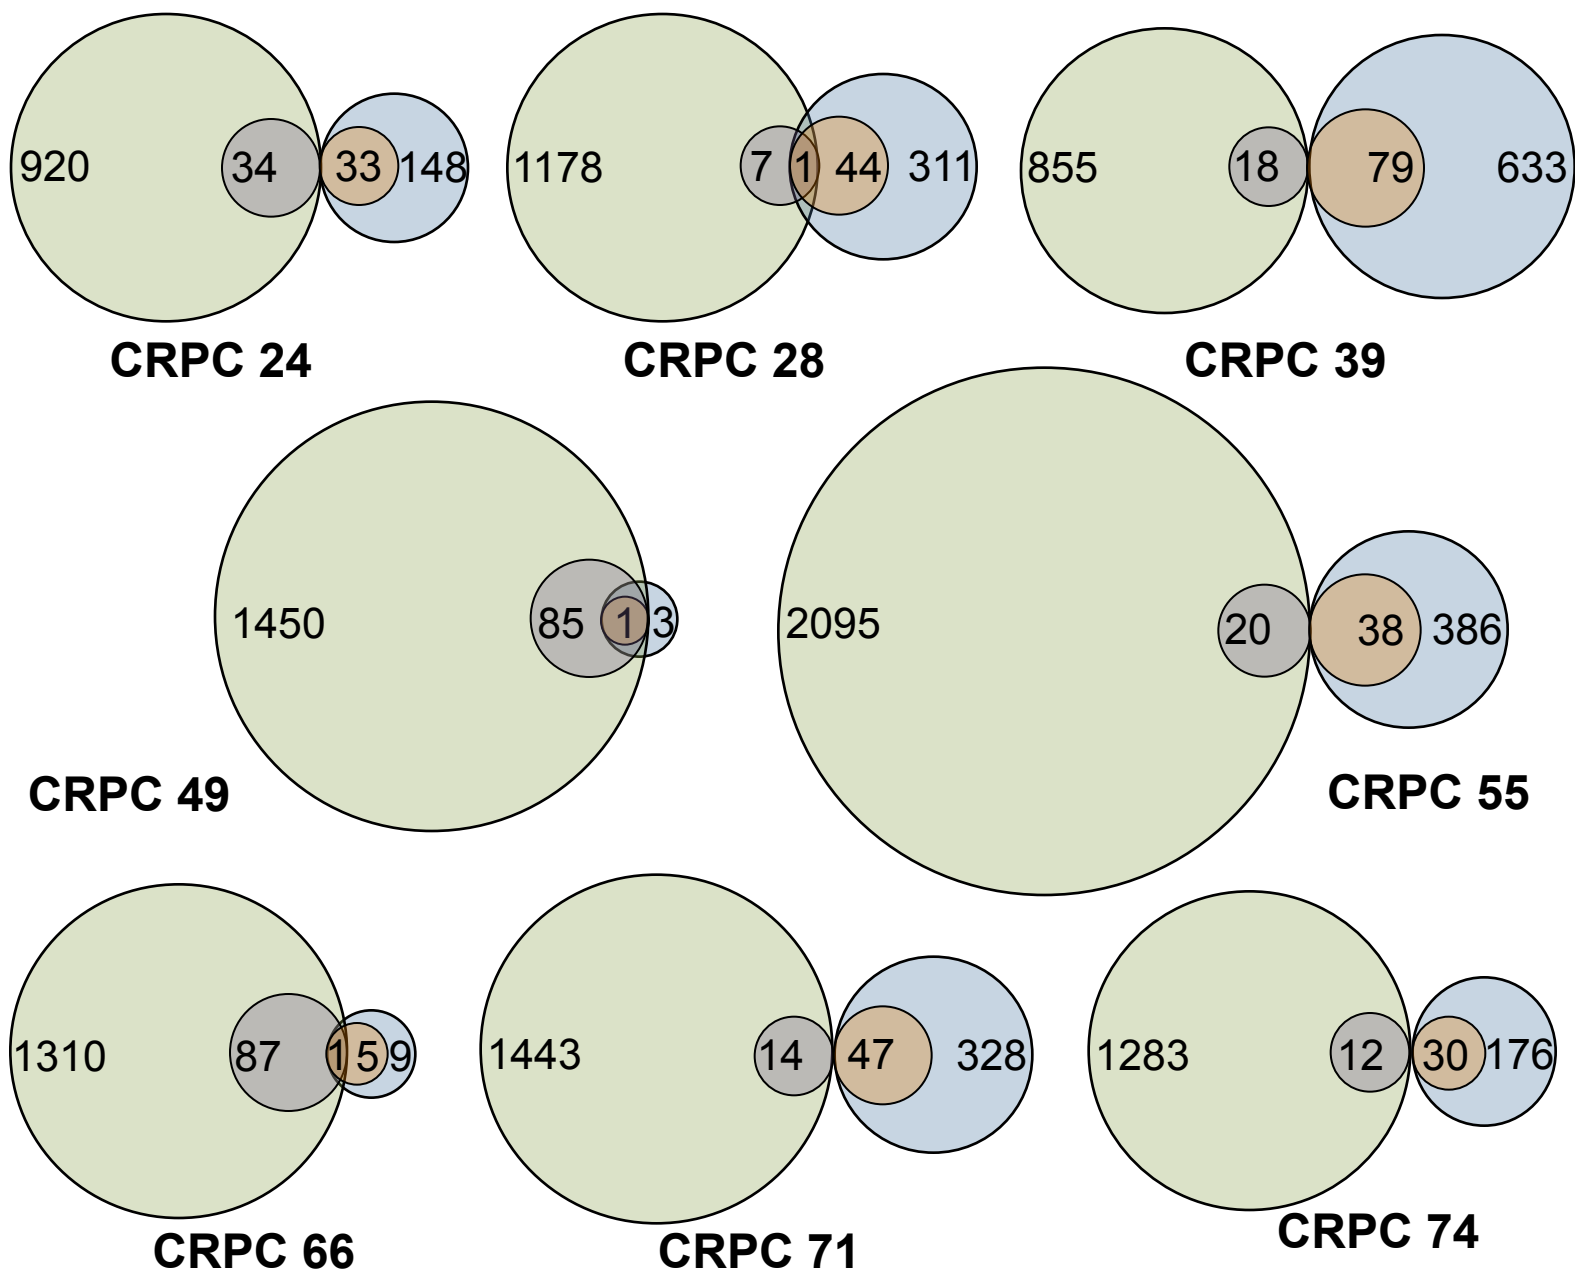

- Putative fusion transcripts reported by deFuse
- deFuse putative fusions with probability score >50%
- Putative chimeric transcripts reported by ChimeraScan
- ChimeraScan putative transcripts with  $\geq 1$  breakpoint-spanning read
- Number of high-confidence fusion genes detected by both algorithms
