# Supplementary material
Source: PubMed Central journal article supplement (PMC4312515)

# Supplementary Figure 7

## CRPC 24

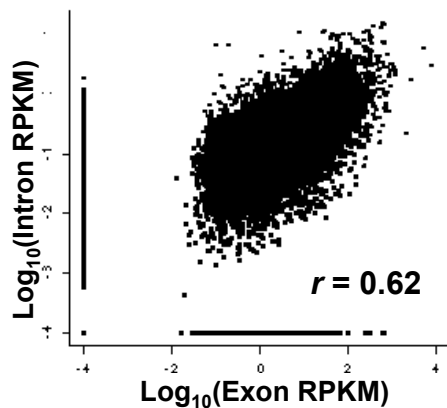

## CRPC 28

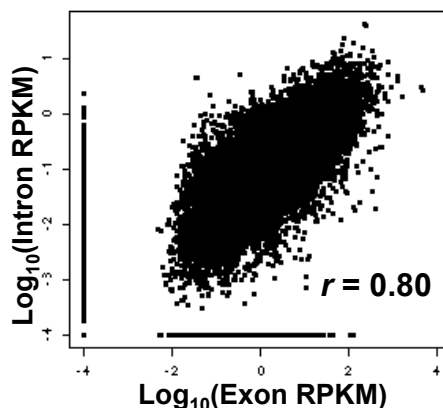

## CRPC 39

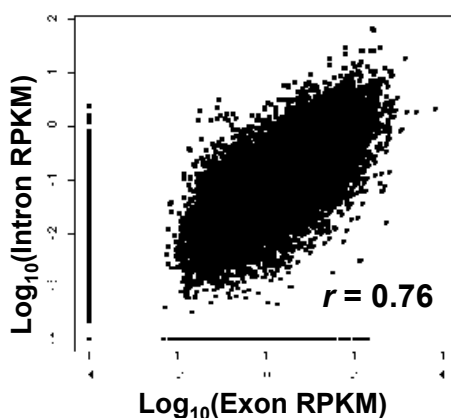

## CRPC 49

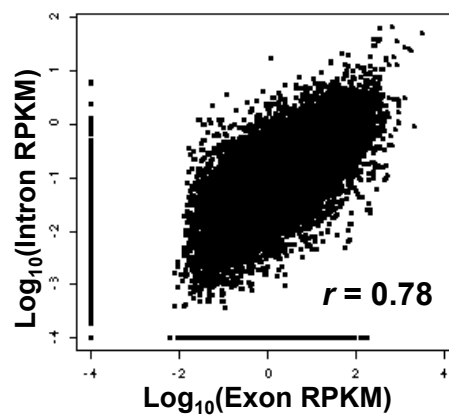

## CRPC 55

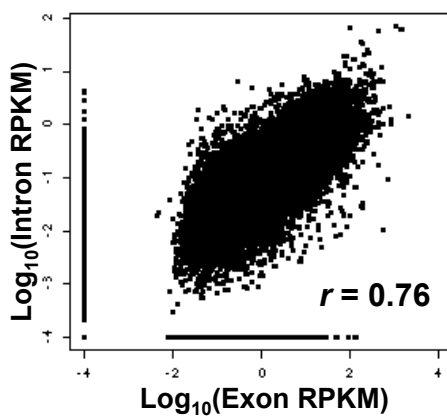

## CRPC 66

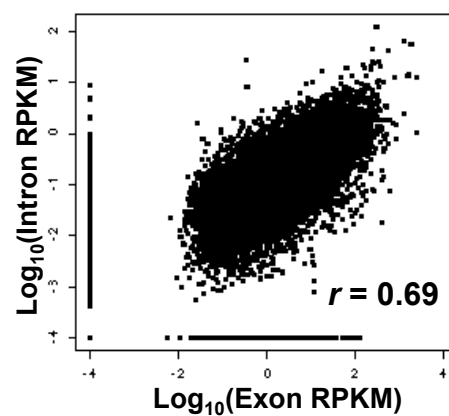

## CRPC 71

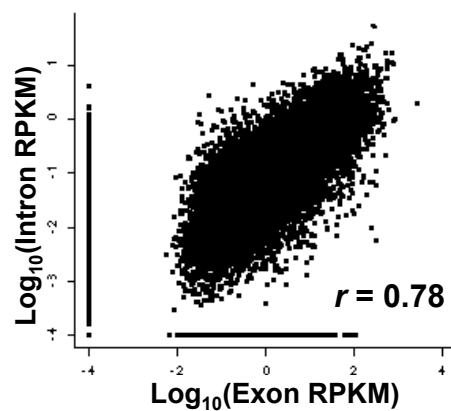

## CRPC 74

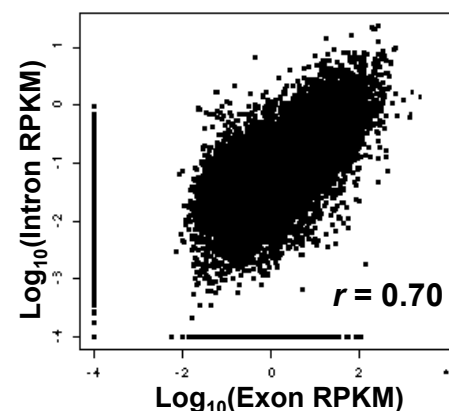

Supplement: NIHMS626172-supplement-10.pdf [file NIHMS626172-supplement-10.pdf]

# Supplementary Figure 8

A

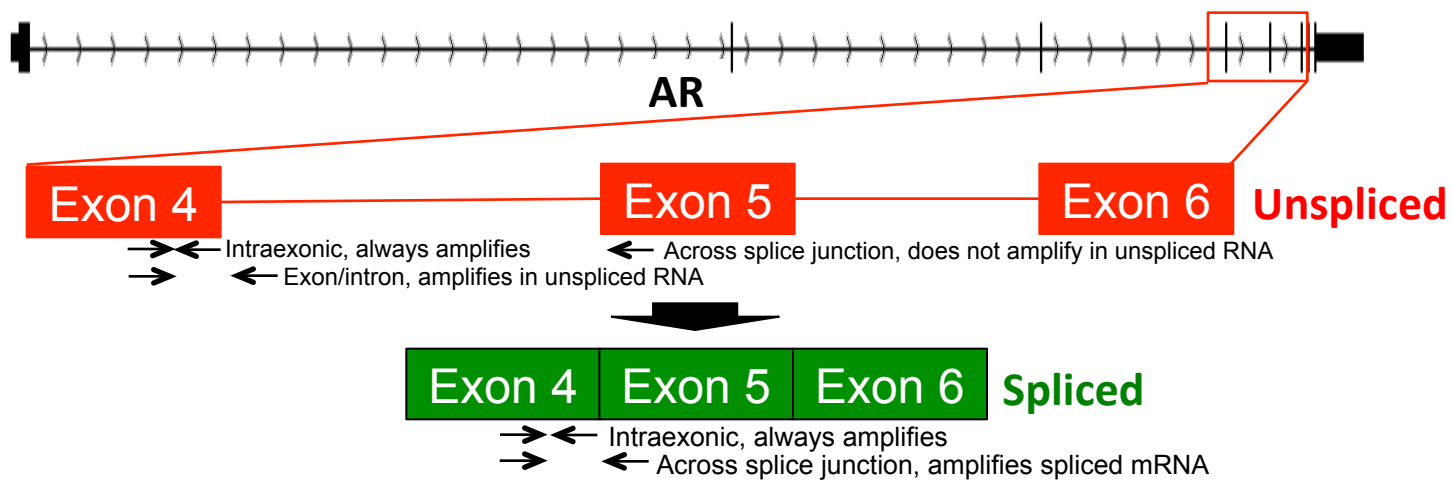

Supplement: NIHMS626172-supplement-11.pdf [file NIHMS626172-supplement-11.pdf]

# Supplementary Figure 1

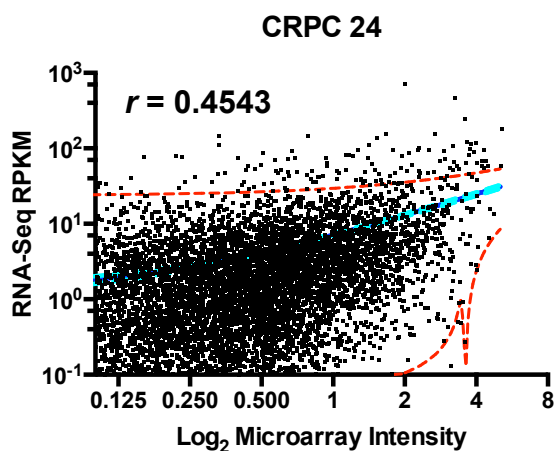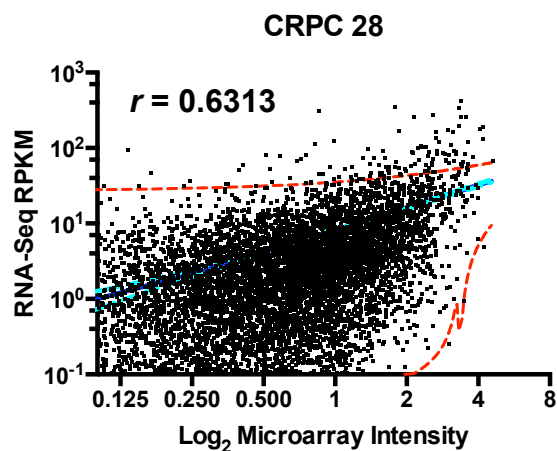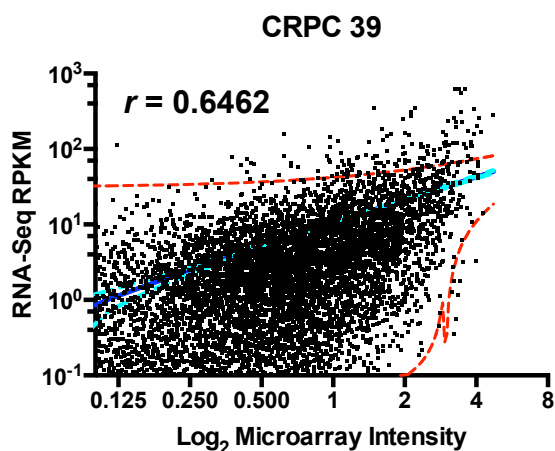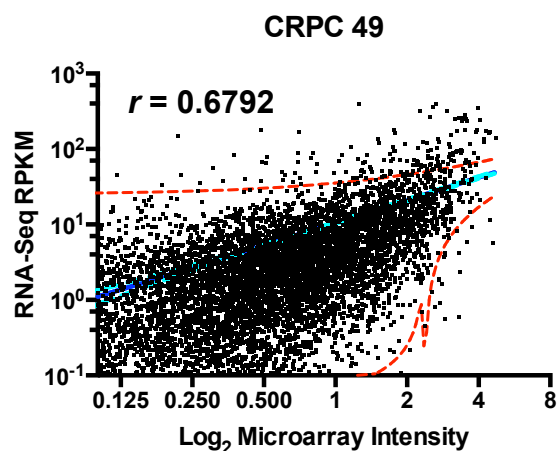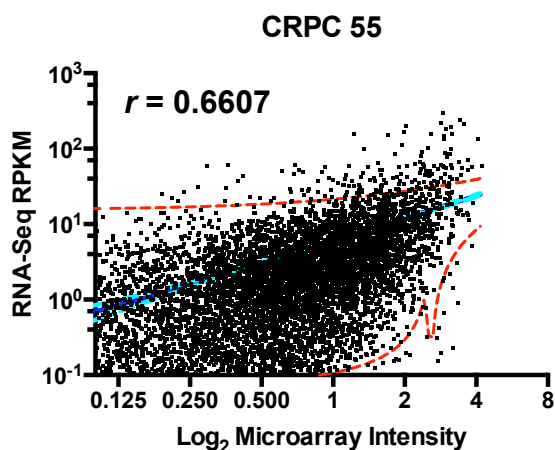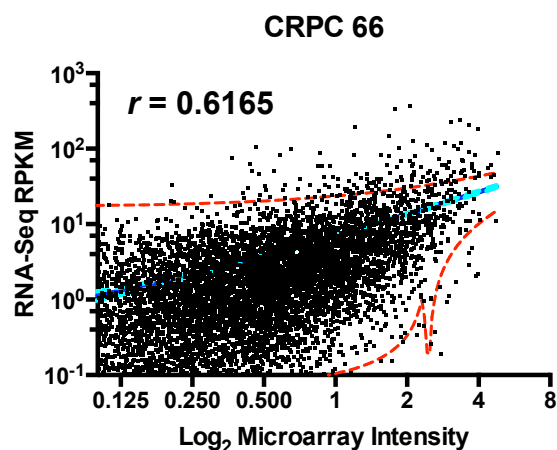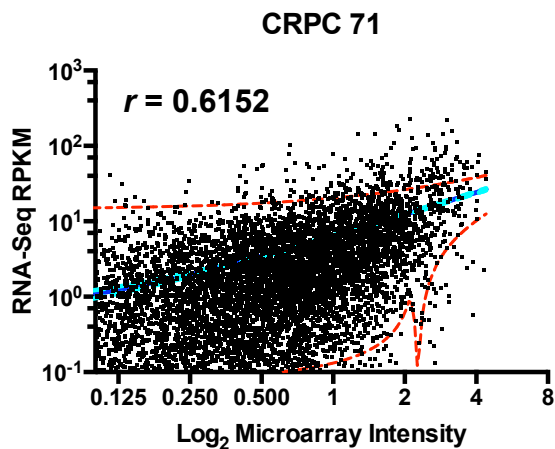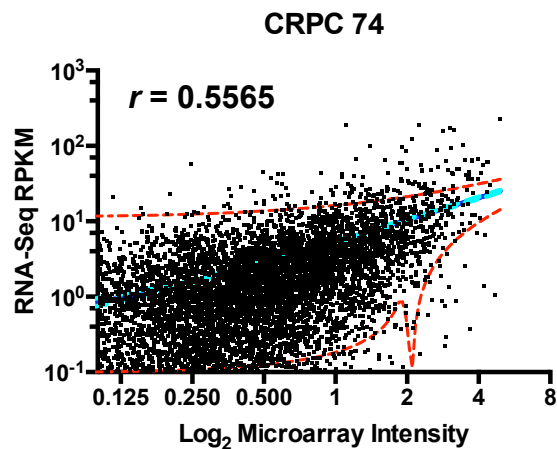

Supplement: NIHMS626172-supplement-4.pdf [file NIHMS626172-supplement-4.pdf]

# Supplementary Figure 4

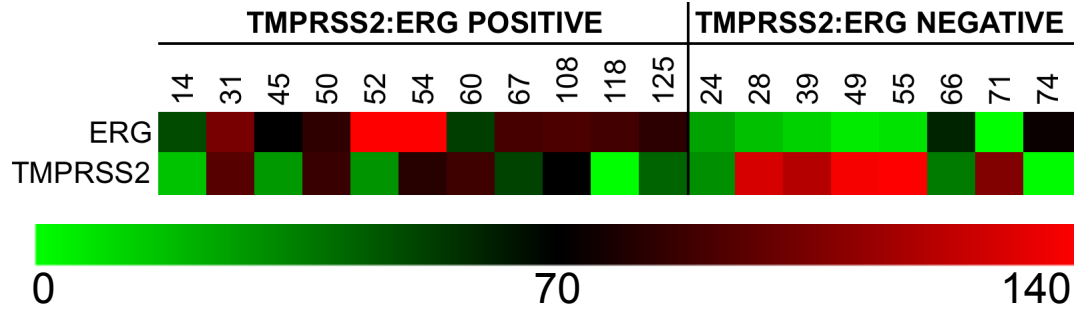

Supplement: NIHMS626172-supplement-7.pdf [file NIHMS626172-supplement-7.pdf]

# Supplementary Figure 5

A

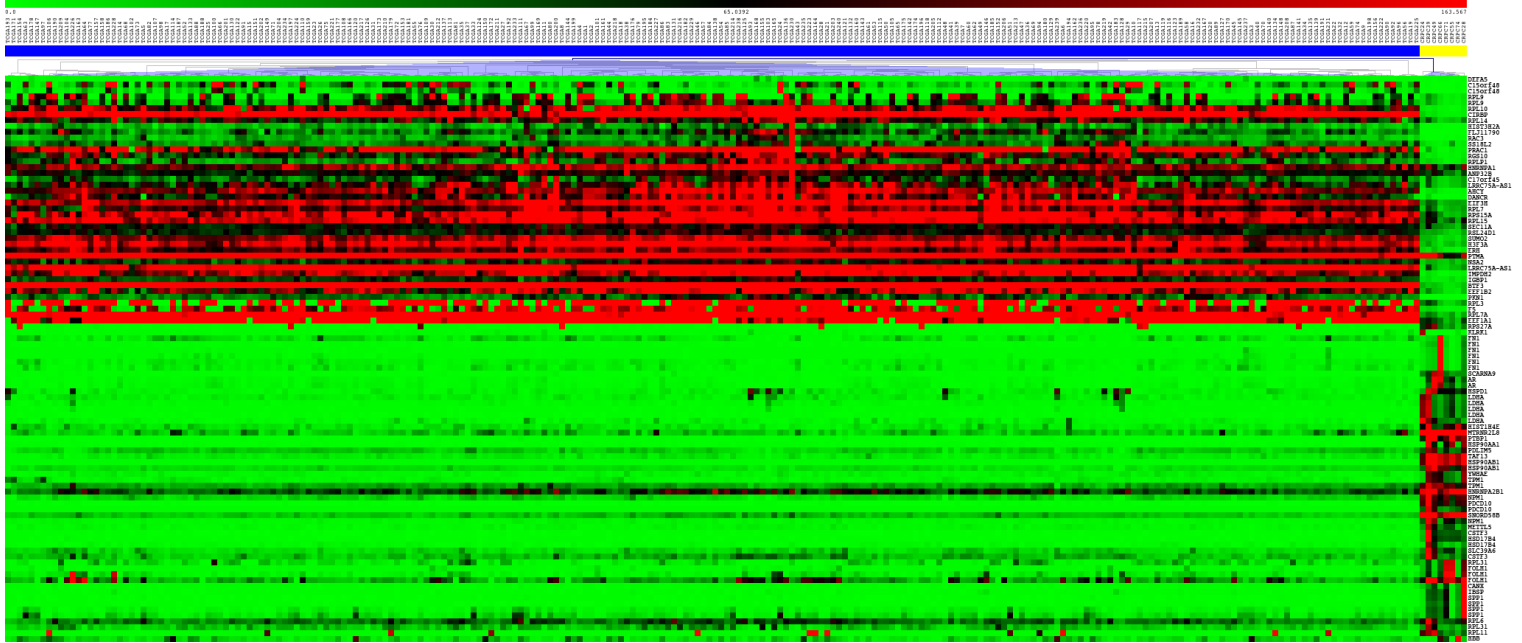

B

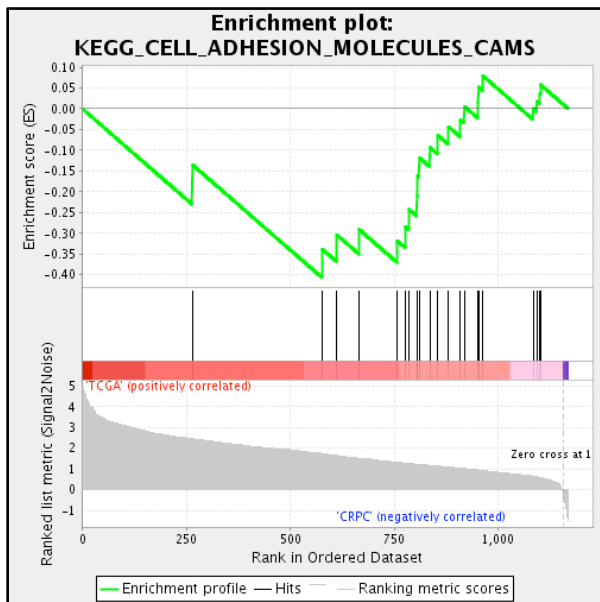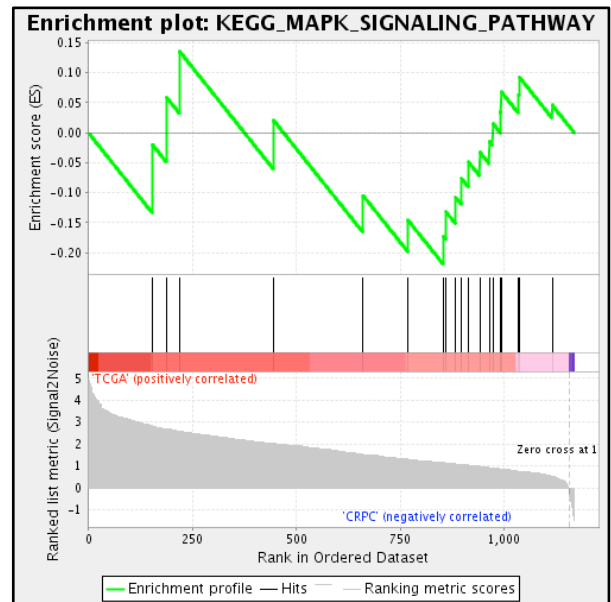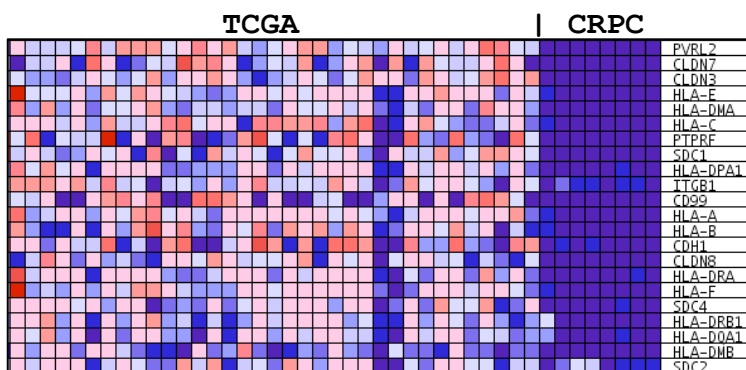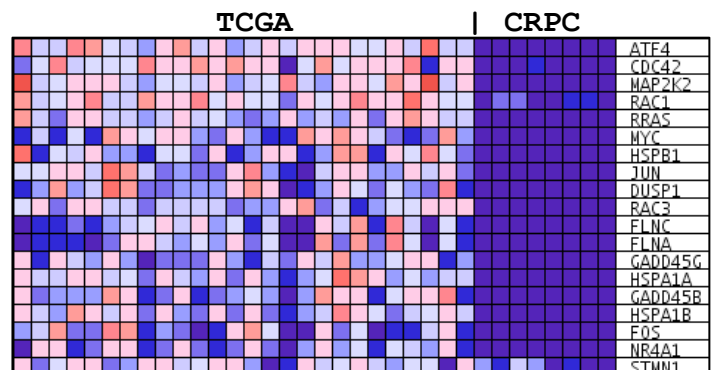

Supplement: NIHMS626172-supplement-8.pdf [file NIHMS626172-supplement-8.pdf]

# Supplementary Figure 6

**A**

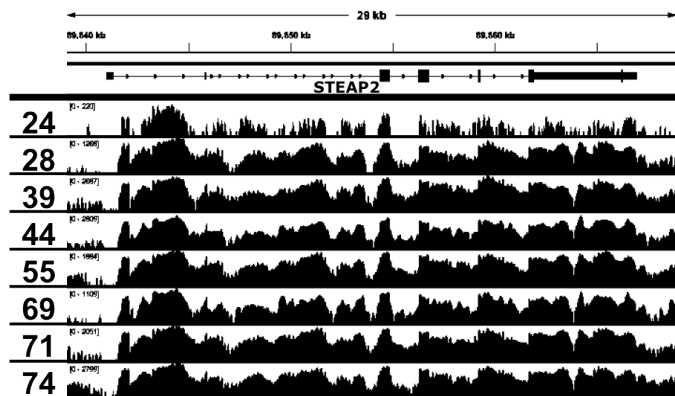

**B**

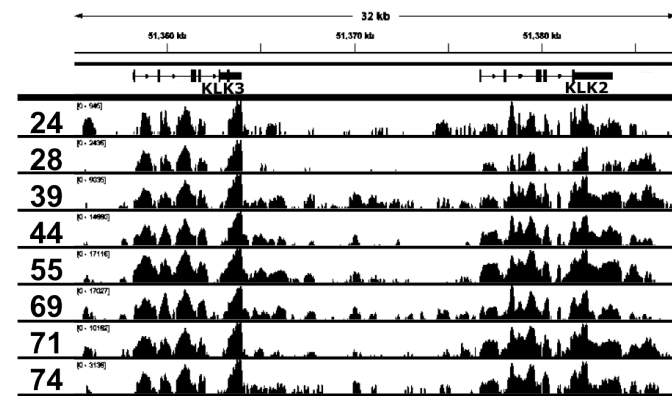

**C**

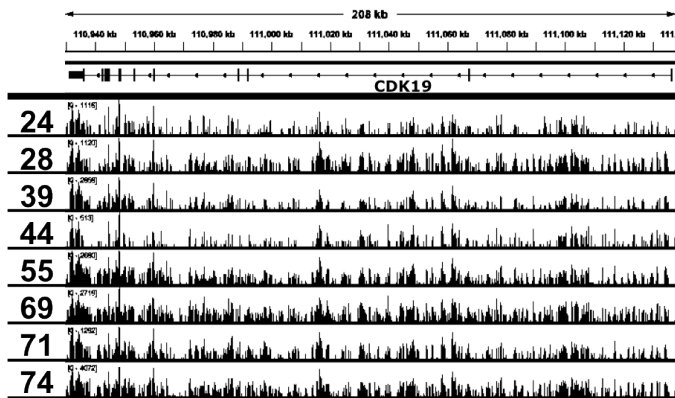

**D**

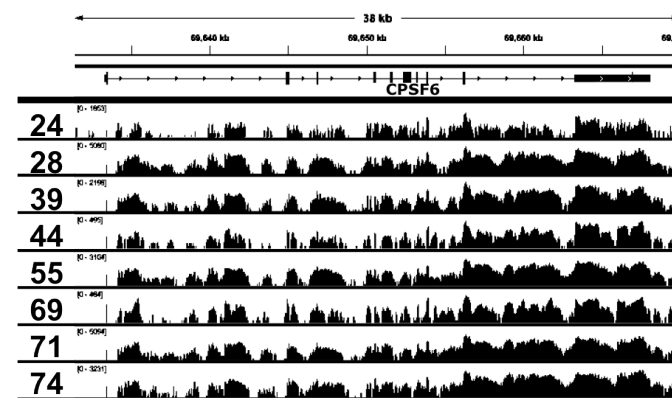

Supplement: NIHMS626172-supplement-9.pdf [file NIHMS626172-supplement-9.pdf]
